# Supplementary material
Source: PubMed Central journal article supplement (PMC1266134)

**A**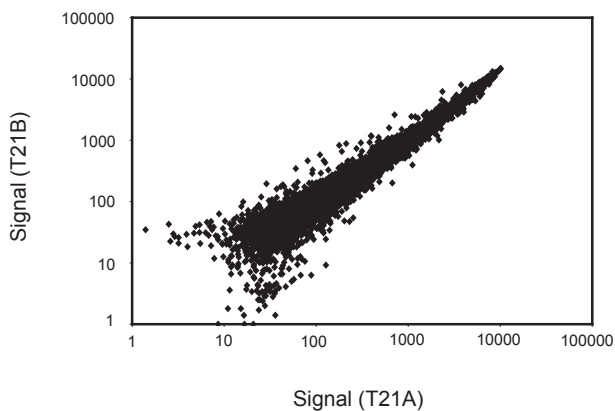**B**

| GeneChip | $r^2$ (duplicates) |
|----------|--------------------|
| T0       | 0.8946             |
| T12      | 0.8253             |
| T21      | 0.9268             |
| T30      | 0.9418             |
| T33      | 0.9480             |
| T36      | 0.9628             |
| T42      | 0.9460             |
| T48      | 0.9295             |
| T63      | 0.9618             |
| average  | 0.9263             |

**C**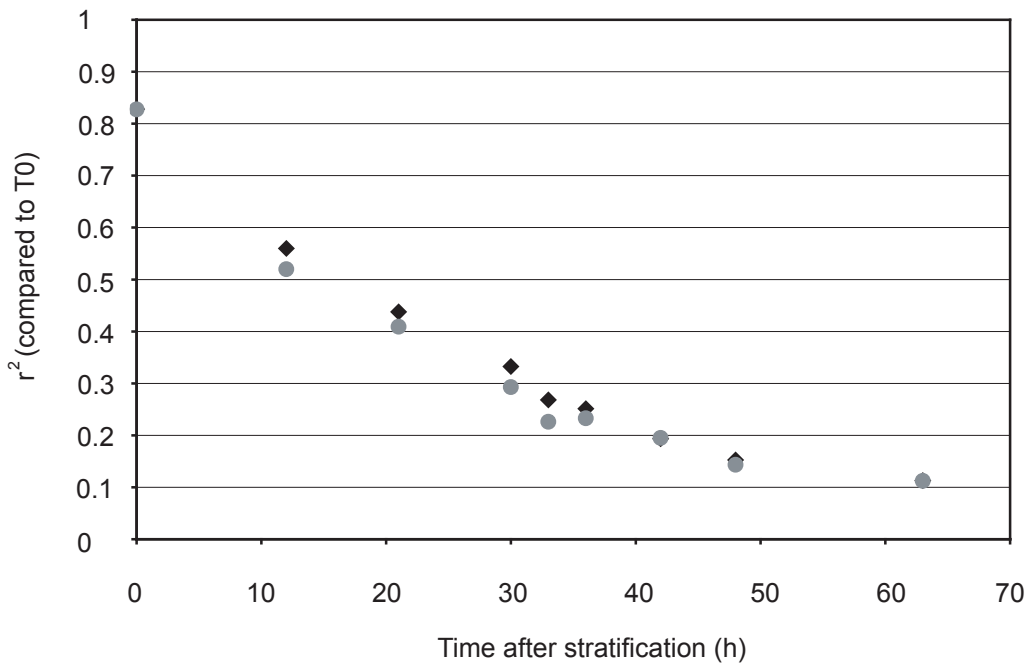

Supplement: pnas_0507581102_1.pdf [file pnas_0507581102_1.pdf]

Phase

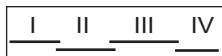

Time after stratification (h)

0 12 21 30 33 36 42 48 63

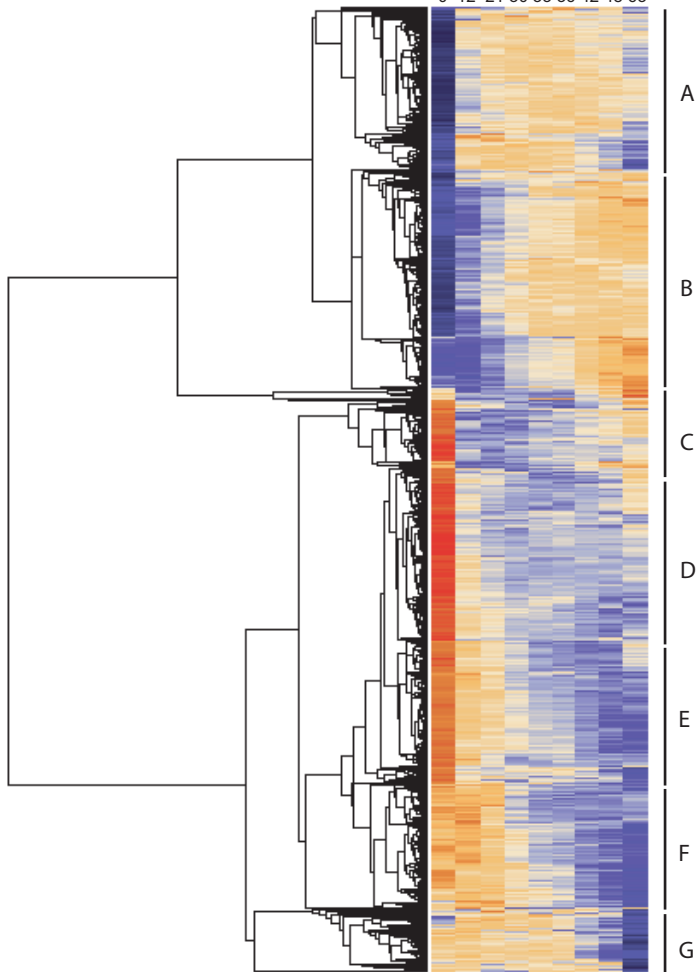

Expression level (SLR, normalised)

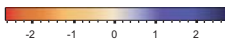

Supplement: pnas_0507581102_2.pdf [file pnas_0507581102_2.pdf]

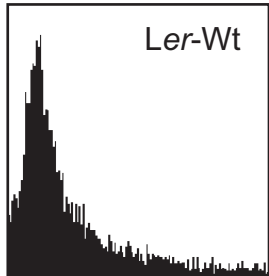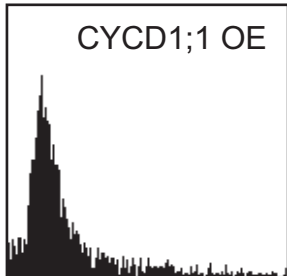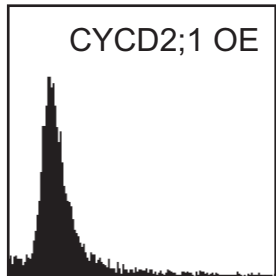

Supplement: pnas_0507581102_3.pdf [file pnas_0507581102_3.pdf]
